# Supplementary material
Source: publisher site journal article supplement (https://www.e-cmh.org/upload/media/cmh-2022-0322-Supplementary-Fig-2.pdf)
Supplement: Supplementary file 1 [file cmh-2022-0322-Supplementary-Fig-2.pdf]

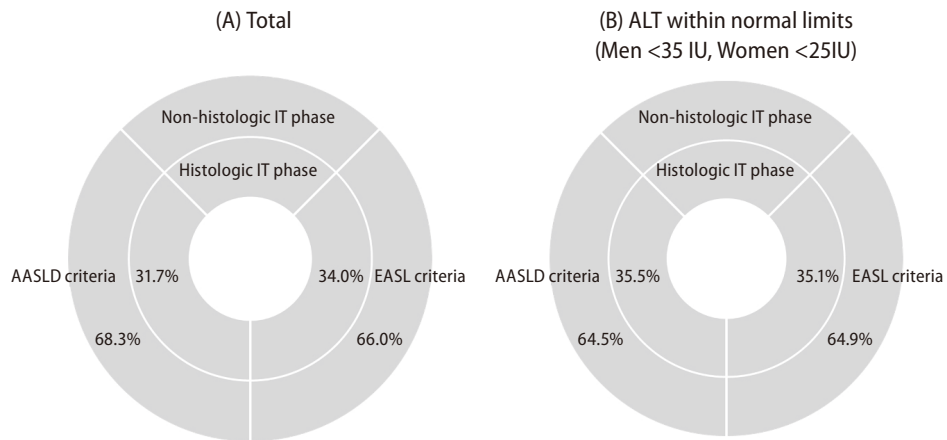

**Supplementary Figure 2.** Proportion of immune-tolerant phase according to each diagnostic criterion. (A) Total, (B) ALT within normal limits. ALT, alanine aminotransferase; AASLD, American Association for the Study of Liver Diseases; EASL, European Association for the Study of the Liver; IT, immune-tolerant.
